# Supplementary material for: Elevated Levels of Circulating Hsp70 and an Increased Prevalence of CD94+/CD69+ NK Cells Is Predictive for Advanced Stage Non-Small Cell Lung Cancer
Source: MDPI journal article supplement (doi:10.3390/cancers14225701), 2022-11-21
Supplement: s1 [file s1]

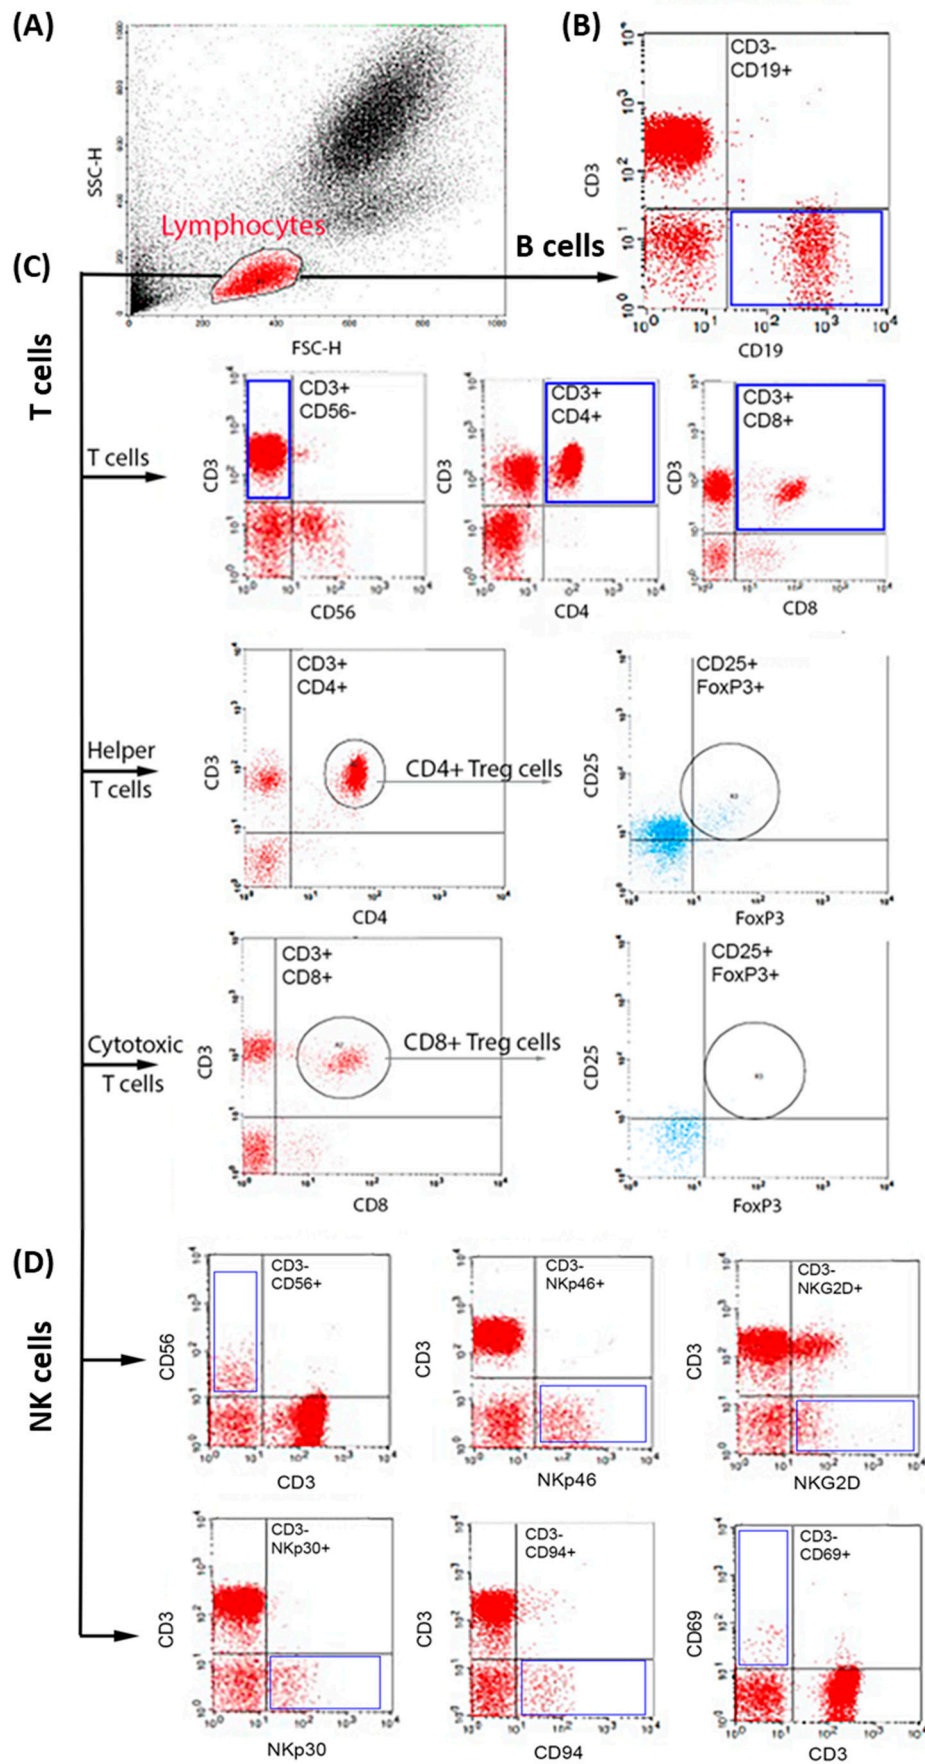

**Figure S1.** Representative gating strategy for identifying lymphocyte subpopulations and their expressions. The gating strategy involved the identification of lymphocyte based on **(A)** FSC vs. SSC, followed by separation of the **(B)** CD3-/CD19+ B cell subpopu-

lation, **(C)** CD3+ T cell subpopulations, and **(D)** CD3- NK cell subpopulations. Flow cytometry plots show receptor expression relative to their counterparts incubated with the respective isotype-matched control mAb.
